# Supplementary material for: Toxicology Study of Intra-Cisterna Magna Adeno-Associated Virus 9 Expressing Human Alpha-L-Iduronidase in Rhesus Macaques
Source: PubMed Central journal article supplement (PMC6070681; doi:10.1016/j.omtm.2018.06.003), 2018-07-14
Supplement: mmc1.pdf [file mmc1.pdf]

**OMTM, Volume 10**

**Supplemental Information**

**Toxicology Study of Intra-Cisterna Magna**

**Adeno-Associated Virus 9 Expressing Human**

**Alpha-L-Iduronidase in Rhesus Macaques**

**Juliette Hordeaux, Christian Hinderer, Tamara Goode, Nathan Katz, Elizabeth L. Buza, Peter Bell, Roberto Calcedo, Laura K. Richman, and James M. Wilson**

**Figure S1. Blood anomalies induced by the IS regimen.** WBC counts, neutrophils, hemoglobin, ALT, phosphate, and albumin levels were transiently modified in at least one IS animal, after the onset of IS and before vector dosing, without any relation to intrathecal AAV9.hIDUA administration. Dotted lines represent the baseline average plus or minus two standard deviations. Black = vehicle control; red = HD; green = LD; purple = HD IS.

Figure S1.

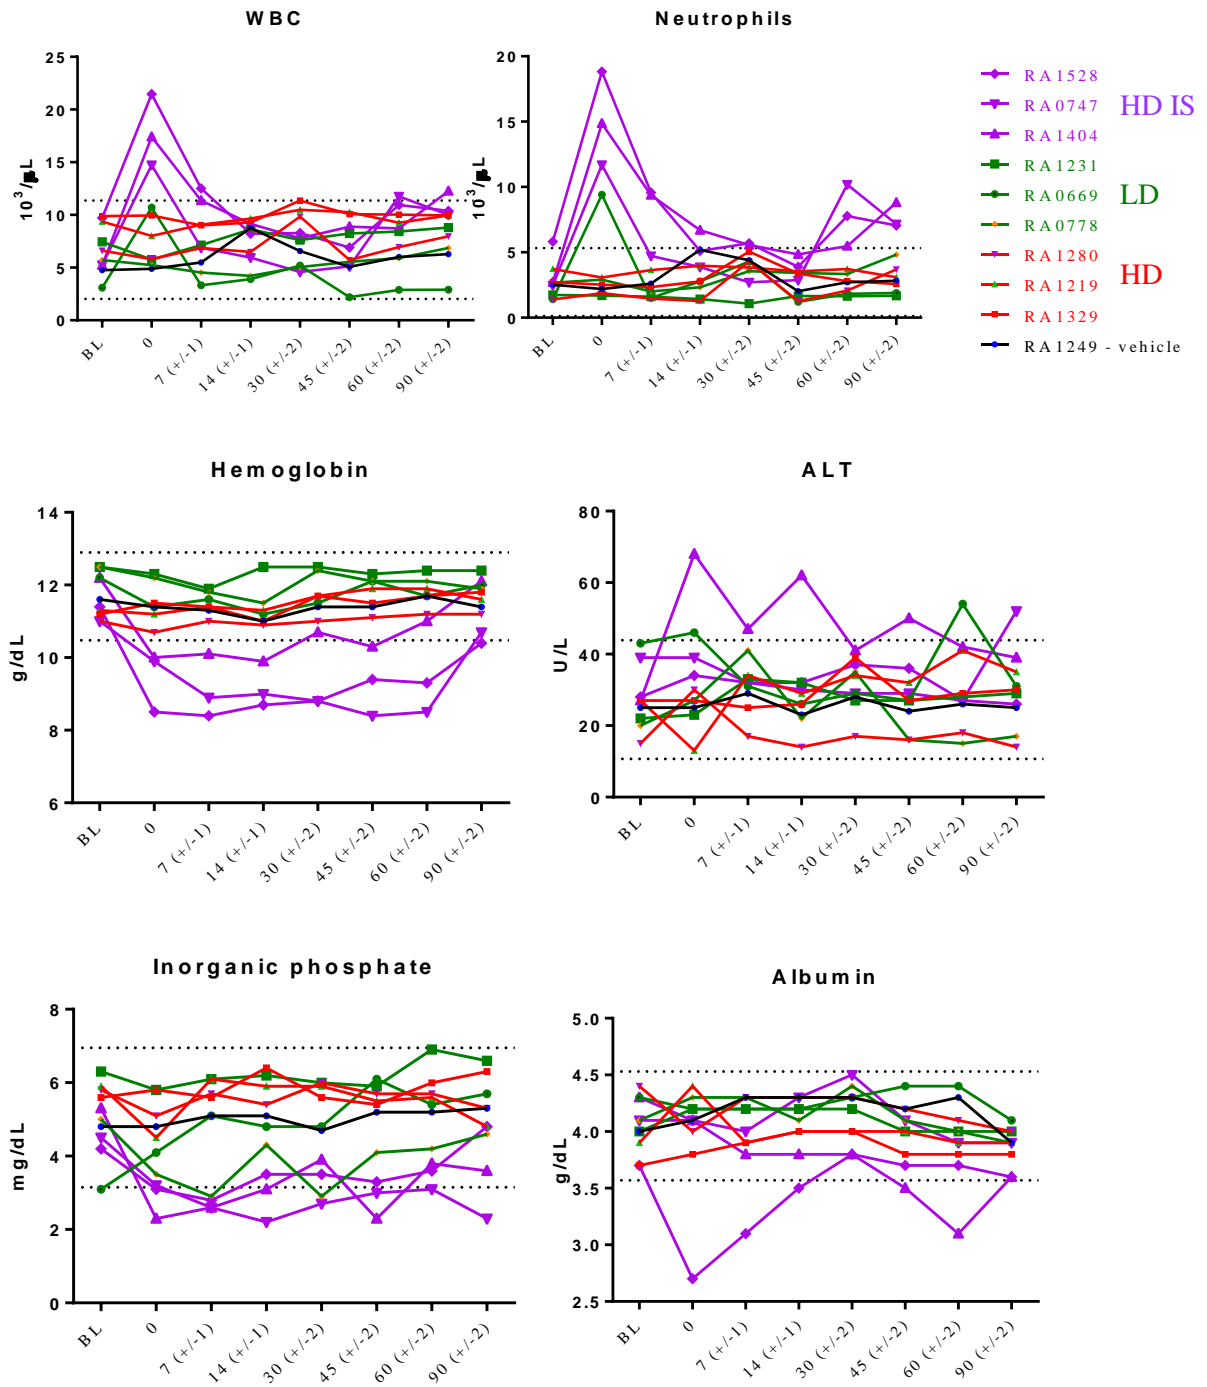

**Table S1. Animal weights, study RGX150210p**

| Animal ID | Group |         | BL   | D0   | D3   | D7 (+/-2) | D14 (+/-2) | D21 (+/-2) | D30 (+/-2) | D45 (+/-2) | D60 (+/-2) | D90 (+/-2) | D120 (+/-2) | D150 (+/-2) | D180 (+/-2) |
|-----------|-------|---------|------|------|------|-----------|------------|------------|------------|------------|------------|------------|-------------|-------------|-------------|
| RA1492    | 1A    | HD D14  | 4.51 | 4.49 | 4.5  | 4.58      | 4.7        | NA         | NA         | NA         | NA         | NA         | NA          | NA          | NA          |
| RA1292    |       |         | 5.49 | 5.54 | 5.66 | 5.48      | 5.51       | NA         | NA         | NA         | NA         | NA         | NA          | NA          | NA          |
| RA0502    |       |         | 5.19 | 5.22 | 5.26 | 5.34      | 5.46       | NA         | NA         | NA         | NA         | NA         | NA          | NA          | NA          |
| RA1470    | 1B    | HD D90  | 4.93 | 5.05 | 5.05 | 4.92      | 5          | 5.27       | 5.6        | 5.91       | 5.75       | 5.9        | NA          | NA          | NA          |
| RA1514    |       |         | 4.41 | 4.33 | 4.39 | 4.4       | 4.64       | 4.41       | 4.39       | 4.86       | 4.95       | 4.65       | NA          | NA          | NA          |
| RA1287    |       |         | 5.36 | 5.44 | 5.49 | 5.66      | 5.55       | 5.71       | 5.6        | 5.55       | 5.7        | 5.75       | NA          | NA          | NA          |
| RA0773    | 1C    | HD D180 | 5.65 | 5.75 | 5.79 | 5.98      | 6.08       | 6.19       | 6.45       | 6.51       | 6.3        | 6.5        | 6.25        | 5.85        | 6.05        |
| RA1304    |       |         | 5.25 | 5.25 | 5.25 | 5.18      | 5.26       | 5.39       | 5.14       | 5.61       | 5.65       | 5.7        | 6.25        | 6.45        | 6.65        |
| RA1532    |       |         | 5.39 | 5.74 | 5.86 | 5.8       | 5.9        | 6.07       | 6          | 5.7        | 6.05       | 6.45       | 6.35        | 6.05        | 6.1         |
| RA1534    | 2     | vehicle | 5.09 | 5.15 | 5.09 | 5.2       | 5.4        | NA         | NA         | NA         | NA         | NA         | NA          | NA          | NA          |
| RA0775    |       |         | 5.84 | 5.85 | 5.78 | 5.72      | 5.93       | 6.17       | 6.1        | 6.6        | 7.5        | 6.4        | NA          | NA          | NA          |
| RA1314    |       |         | 5.45 | 5.44 | 5.44 | 5.52      | 5.64       | 5.79       | 5.79       | 5.95       | 6          | 6.1        | NA          | NA          | NA          |

**Table S2. Animal weights, study RGX160822p**

| Animal ID | Group |         | BL   | D0   | D7 (+/- 1) | D14 (+/- 1) | D30  | D45 (+/- 1) | D60 (+/- 2) | D90 (+/- 3) |
|-----------|-------|---------|------|------|------------|-------------|------|-------------|-------------|-------------|
| RA1249    | 1     | vehicle | 6.60 | 6.55 | 6.50       | 6.60        | 6.80 | 6.75        | 6.90        | 7.30        |
| RA1329    | 2     | HD      | 8.85 | 8.75 | 8.85       | 9.00        | 9.10 | 8.50        | 9.00        | 9.20        |
| RA1219    |       |         | 6.90 | 6.80 | 7.00       | 7.05        | 7.20 | 7.10        | 7.15        | 7.45        |
| RA1280    |       |         | 7.80 | 7.90 | 7.85       | 8.00        | 8.30 | 8.60        | 8.75        | 9.25        |
| RA0778    | 3     | LD      | 4.10 | 4.10 | 4.05       | 4.10        | 4.10 | 4.20        | 4.30        | 4.25        |
| RA0669    |       |         | 5.80 | 5.80 | 5.80       | 5.90        | 6.45 | 6.15        | 6.15        | 6.40        |
| RA1231    |       |         | 8.05 | 7.80 | 7.75       | 7.85        | 7.85 | 8.10        | 8.20        | 8.70        |
| RA1528    | 4     | HD + IS | 5.70 | 5.55 | 5.40       | 5.50        | 5.30 | 5.60        | 5.45        | 5.50        |
| RA0747    |       |         | 5.85 | 5.75 | 5.65       | 5.80        | 5.75 | 5.70        | 5.70        | 5.85        |
| RA1404    |       |         | 5.60 | 5.30 | 5.25       | 5.30        | 5.30 | 5.35        | 5.25        | 5.10        |

**Table S3. CSF WBC counts**

|                  | D0    | D3  | D7    | D14    | D21   | D30   | D45 | D60 | D90 | D120 | D150 | D180  |
|------------------|-------|-----|-------|--------|-------|-------|-----|-----|-----|------|------|-------|
| RA1534 - vehicle | 0     | 0   | 0     | 0      | N/A   | N/A   | N/A | N/A | N/A | N/A  | N/A  | N/A   |
| RA0775 - vehicle | 0     | 0   | 0     | 0      | 0     | 0     | 0   | 0   | N/A | N/A  | N/A  | N/A   |
| RA1314 - vehicle | Blood | 1   | 0     | 1      | 0     | 4     | 0   | 0   | 0   | N/A  | N/A  | N/A   |
| RA1249 - vehicle | 0     | N/A | 0     | Blood  | Blood | 0     | 1   | 1   | 0   | N/A  | N/A  | N/A   |
| RA0778 LD        | 0     | N/A | Blood | 0      | N/A   | 1     | 1   | 0   | 0   | N/A  | N/A  | N/A   |
| RA0669 LD        | 0     | N/A | 0     | 0      | N/A   | 0     | 7   | 10  |     | N/A  | N/A  | N/A   |
| RA1231 LD        | 0     | N/A | 0     | 0      | N/A   | 2     | 1   | 2   | 0   | N/A  | N/A  | N/A   |
| RA1492 HD        | 0     | 0   | 0     | 0      | N/A   | N/A   | N/A | N/A | N/A | N/A  | N/A  | N/A   |
| RA1292 HD        | 4     | 1   | 2     | 0      | N/A   | N/A   | N/A | N/A | N/A | N/A  | N/A  | N/A   |
| RA0502 HD        | 0     | 1   | 0     | 0      | N/A   | N/A   | N/A | N/A | N/A | N/A  | N/A  | N/A   |
| RA1470 HD        | Blood | 2   | 0     | 17     | 12    | Blood | 28  | 14  | 4   | N/A  | N/A  | N/A   |
| RA1514 HD        | Blood | 3   | 0     | 0      | 12    | 11    | 4   | 1   | 1   | N/A  | N/A  | N/A   |
| RA1287 HD        | 0     | 0   | 0     | 0      | 10    | 27    | 2   | 1   | 0   | N/A  | N/A  | N/A   |
| RA1329 HD        | 0     | N/A | 0     | 0      | N/A   | 0     | 0   | 4   | 2   | N/A  | N/A  | N/A   |
| RA1219 HD        | 0     | N/A | 0     | 0      | N/A   | 10.0* | 1   | 2   | 0   | N/A  | N/A  | N/A   |
| RA1280 HD        | 0     | N/A | 0     | 0      | N/A   | 3     | 2   | 2   | 0   | N/A  | N/A  | N/A   |
| RA0773 HD        | 0     | 0   | 0     | 0      | 4     | 4     | 11  | 1   | 0   | 1    | 0    | 0     |
| RA1304 HD        | 0     | 1   | 3     | 0      | 1     | 1     | 0   | 2   | 1   | 3    | 0    | 2     |
| RA1532 HD        | 0     | 1   | 0     | 6      | 18    | 27    | 11  | 3   | 7   | 16   | 13   | Blood |
| RA1404 HD + IS   | 0     | N/A | 1     | 1      | N/A   | 0     | 0   | 0   | 0   | N/A  | N/A  | N/A   |
| RA1528 HD + IS   |       | N/A | 0     | 0      | N/A   | 0     | 0   | 0   | 0   | N/A  | N/A  | N/A   |
| RA0747 HD + IS   | 1     | N/A | 1     | 10.00* | N/A   | 0     | 0   | 0   | 0   | N/A  | N/A  | N/A   |

\* values excluded: not confirmed by cytosmear analysis

Blood: values excluded when red blood cell count > 500

**Table S4. PBMC IFN- $\gamma$  ELISPOT**

| Group       | Animal | Study Day | Average SFU per million PBMC |        |        |        |         |         |         | PHA + ctrl |      |
|-------------|--------|-----------|------------------------------|--------|--------|--------|---------|---------|---------|------------|------|
|             |        |           | Medium                       | AAV9-A | AAV9-B | AAV9-C | hIDUA-A | hIDUA-B | hIDUA-C |            |      |
| Vehicle D14 | RA1534 | 0         | 23                           | 13     | 23     | 8      | 23      | 0       | 18      | 1490       |      |
|             |        | 14        | 23                           | 28     | 10     | 13     | 13      | 10      | 28      | 1350       |      |
| HD D14      | RA1492 | 0         | 20                           | 20     | 18     | 13     | 23      | 15      | 15      | 1330       |      |
|             |        | 14        | 25                           | 13     | 23     | 10     | 5       | 20      | 15      | 663        |      |
|             | RA1292 | 0         | 23                           | 33     | 13     | 18     | 15      | 8       | 15      | 608        |      |
|             |        | 14        | 25                           | 13     | 8      | 0      | 18      | 8       | 18      | 515        |      |
|             | RA0502 | 0         | 15                           | 8      | 13     | 10     | 5       | 13      | 3       | 570        |      |
|             |        | 14        | 15                           | 18     | 8      | 8      | 15      | 13      | 5       | 980        |      |
| LD D90      | RA0778 | 0         | 8                            | 28     | 20     | 53     | 40      | 23      | 25      | TNTC       |      |
|             |        | 14        | 18                           | 43     | 60     | 60     | 168     | 88      | 53      | TNTC       |      |
|             |        | 30        | 25                           | 25     | 23     | 23     | 205     | NR      | NR      | TNTC       |      |
|             |        | 60        | 80                           | 65     | 110    | 105    | 313     | 233     | 358     | TNTC       |      |
|             |        | 90        | 28                           | 33     | 50     | 28     | 120     | 93      | 115     | TNTC       |      |
|             | RA0669 | 0         | 0                            | 5      | 0      | 5      | 15      | 5       | 0       | 1235       |      |
|             |        | 14        | 5                            | 15     | 0      | 0      | 5       | 5       | 10      | TNTC       |      |
|             |        | 30        | 5                            | 0      | 3      | 0      | NR      | NR      | NR      | TNTC       |      |
|             |        | 60        | 13                           | 18     | 105    | 155    | 150     | 215     | 83      | TNTC       |      |
|             | RA1231 | 0         | 3                            | 3      | 5      | 3      | 63      | 3       | 8       | TNTC       |      |
|             |        | 14        | 8                            | 0      | 18     | 10     | 85      | 8       | 3       | TNTC       |      |
|             |        | 30        | 13                           | 0      | 13     | 3      | 120     | 33      | 20      | TNTC       |      |
|             |        | 60        | 13                           | 10     | 8      | 15     | 113     | 128     | 25      | TNTC       |      |
|             | HD D90 | RA1470    | 0                            | 5      | 5      | 5      | 0       | 8       | 5       | 23         | TNTC |
|             |        |           | 21                           | 5      | 8      | 5      | 15      | 8       | 3       | 3          | TNTC |
|             |        |           | 90                           | 3      | 15     | 40     | 8       | 73      | 8       | 10         | TNTC |
|             |        | RA1514    | 0                            | 13     | 18     | 20     | 25      | 40      | 10      | 28         | TNTC |
|             |        |           | 21                           | 10     | 25     | 28     | 30      | 45      | 45      | 15         | TNTC |
| 90          |        |           | 8                            | 13     | 15     | 8      | 100     | 20      | 10      | 1325       |      |
| RA1287      |        | 0         | 5                            | 10     | 8      | 5      | 5       | 30      | 10      | 1185       |      |
|             |        | 21        | 5                            | 8      | 10     | 25     | 53      | 25      | 8       | TNTC       |      |
|             |        | 90        | 5                            | 15     | 13     | 20     | 50      | 85      | 8       | 888        |      |
| RA1329      |        | 0         | 0                            | 3      | 13     | 0      | 3       | 8       | 3       | TNTC       |      |
|             |        | 14        | 3                            | 35     | 20     | 5      | 63      | 23      | 15      | TNTC       |      |
|             |        | 30        | 3                            | 88     | 3      | 25     | 270     | 168     | 48      | TNTC       |      |
|             |        | 60        | 25                           | 18     | 35     | 8      | 90      | 53      | 23      | TNTC       |      |
|             |        | 90        | 8                            | 20     | 5      | 0      | 43      | 20      | 18      | TNTC       |      |
| RA1219      |        | 0         | 3                            | 5      | 3      | 0      | 5       | 108     | 5       | TNTC       |      |
|             |        | 14        | 15                           | 10     | 13     | 20     | 28      | 138     | 10      | TNTC       |      |
|             |        | 30        | 8                            | 25     | 10     | 18     | 28      | 73      | 25      | TNTC       |      |
|             |        | 60        | 5                            | 0      | 8      | 13     | 20      | 58      | 43      | TNTC       |      |
|             | 90     | 3         | 0                            | 0      | 0      | 3      | 5       | 3       | TNTC    |            |      |
| RA1280      | 0      | 13        | 15                           | 20     | 10     | 30     | 10      | 13      | TNTC    |            |      |
|             | 14     | 20        | 8                            | 20     | 10     | 48     | 5       | 13      | TNTC    |            |      |
|             | 30     | 25        | 10                           | 20     | 25     | 78     | 45      | 35      | TNTC    |            |      |
|             | 60     | 20        | 5                            | 20     | 18     | 85     | 35      | 60      | TNTC    |            |      |
|             | 90     | 3         | 18                           | 10     | 20     | 20     | 55      | 15      | 23      | TNTC       |      |
| HD + IS D90 | RA1404 | 0         | 5                            | 10     | 5      | 5      | 5       | 0       | 35      | TNTC       |      |
|             |        | 30        | 0                            | 0      | 0      | 0      | 3       | 3       | 3       | TNTC       |      |
|             |        | 60        | 0                            | 0      | 3      | 3      | 0       | 5       | 5       | TNTC       |      |
|             |        | 90        | 35                           | 13     | 20     | 40     | 28      | 25      | 20      | TNTC       |      |
|             | RA1528 | 0         | 0                            | 0      | 13     | 15     | 13      | 8       | 0       | TNTC       |      |
|             |        | 30        | 8                            | 5      | 13     | 10     | 8       | 5       | 0       | TNTC       |      |
|             |        | 60        | 8                            | 13     | 28     | 35     | 5       | 18      | 13      | TNTC       |      |
|             |        | 90        | 13                           | 38     | 40     | 85     | 28      | 25      | 30      | TNTC       |      |
|             | RA0747 | 0         | 5                            | 13     | 18     | 8      | 18      | 15      | 8       | TNTC       |      |
|             |        | 30        | 0                            | 13     | 10     | 8      | 20      | 0       | 5       | TNTC       |      |
|             |        | 60        | 20                           | 23     | 33     | 38     | 13      | 20      | 0       | TNTC       |      |
|             |        | 90        | 23                           | 33     | 68     | 160    | 110     | 95      | 38      | TNTC       |      |

**Table S4.** (cont.) PBMC IFN- $\gamma$  ELISPOT

| Group       | Animal # | Study Day | Average SFU per million PBMC |        |        |        |         |         |         |            |
|-------------|----------|-----------|------------------------------|--------|--------|--------|---------|---------|---------|------------|
|             |          |           | Medium                       | AAV9 A | AAV9 B | AAV9 C | hIDUA A | hIDUA B | hIDUA C | PHA + ctrl |
| Vehicle D90 | RA0775   | 0         | 20                           | 13     | 55     | 35     | 40      | 38      | 38      | TNTC       |
|             |          | 21        | 13                           | 13     | 25     | 25     | 10      | 15      | 20      | TNTC       |
|             |          | 90        | 23                           | 30     | 30     | 35     | 20      | 30      | 10      | TNTC       |
|             | RA1314   | 0         | 23                           | 13     | 13     | 5      | 18      | 18      | 10      | 1340       |
|             |          | 21        | 13                           | 3      | 10     | 10     | 0       | 15      | 3       | 1390       |
|             |          | 90        | 3                            | 18     | 13     | 13     | 33      | 10      | 20      | TNTC       |
|             | RA1249   | 0         | 15                           | 20     | 0      | 5      | 5       | 5       | 0       | 1425       |
|             |          | 14        | 28                           | 8      | 13     | 35     | 18      | 25      | 125     | TNTC       |
|             |          | 30        | 28                           | 43     | 25     | NR     | 25      | 20      | NR      | TNTC       |
|             |          | 60        | 53                           | 63     | 33     | 20     | 28      | 30      | 35      | TNTC       |
|             |          | 90        | 8                            | 8      | 3      | 10     | 10      | 0       | 18      | TNTC       |
|             | HD D180  | RA0773    | 0                            | 5      | 15     | 3      | 10      | 10      | 5       | 15         |
| 21          |          |           | 3                            | 8      | 3      | 10     | 13      | 10      | 0       | 1560       |
| 90          |          |           | 8                            | 0      | 8      | 5      | 10      | 15      | 8       | 900        |
| 180         |          |           | 30                           | 15     | 20     | 33     | 45      | 45      | 20      | 2000       |
| RA1304      |          | 0         | 8                            | 0      | 0      | 0      | 0       | 0       | 0       | 265        |
|             |          | 21        | 5                            | 3      | 3      | 0      | 5       | 3       | 5       | 95         |
|             |          | 90        | 3                            | 3      | 8      | 8      | 0       | 13      | 8       | 253        |
|             |          | 180       | 15                           | 18     | 18     | 28     | 28      | 20      | 13      | 503        |
| RA1532      |          | 0         | 5                            | 3      | 0      | 5      | 8       | 0       | 3       | TNTC       |
|             |          | 21        | 0                            | 3      | 0      | 3      | 8       | 8       | 8       | TNTC       |
|             |          | 90        | 23                           | 23     | 13     | 30     | 70      | 55      | 20      | TNTC       |
|             |          | 180       | 18                           | 68     | 65     | 108    | 95      | 63      | 65      | TNTC       |

SFU = Spot Forming Unit. NR = not enough cells

Positive responses, defined as an average value >55 SFU/million PBMCs and at least three times greater than the medium negative control, are highlighted in red. TNTC = too numerous to be counted

**Table S5.** Incidence and severity of the DRG finding

| Study                                                            | RGX151002p       |         |                  |         |                  | RGX160822p |                  |                  |                  |
|------------------------------------------------------------------|------------------|---------|------------------|---------|------------------|------------|------------------|------------------|------------------|
|                                                                  | 14               |         | 90               |         | 180              | 90         |                  |                  |                  |
| Group                                                            | 1A               | 2A      | 1B               | 2B      | 1C               | 1          | 2                | 3                | 4                |
| Dose (GC)                                                        | 10 <sup>13</sup> | Control | 10 <sup>13</sup> | Control | 10 <sup>13</sup> | Control    | 10 <sup>13</sup> | 10 <sup>12</sup> | 10 <sup>13</sup> |
| Immunosuppression                                                | No               | No      | No               | No      | No               | No         | No               | No               | Yes              |
| Number of Animals                                                | 3                | 1       | 3                | 2       | 3                | 1          | 3                | 3                | 3                |
| No. examined                                                     | 0                | 0       | 0                | 0       | 0                | 1          | 3                | 3                | 3                |
| <b>Dorsal root ganglion, Cervical</b>                            |                  |         |                  |         |                  |            |                  |                  |                  |
| Neuronal cell body degeneration with mononuclear cell infiltrate |                  |         |                  |         |                  |            |                  |                  |                  |
| No significant abnormalities                                     |                  |         |                  |         |                  |            |                  |                  |                  |
| Grade 1                                                          |                  |         |                  |         |                  |            |                  |                  |                  |
| <b>Dorsal root ganglion, Thoracic</b>                            |                  |         |                  |         |                  |            |                  |                  |                  |
| Neuronal cell body degeneration with mononuclear cell infiltrate |                  |         |                  |         |                  |            |                  |                  |                  |
| No significant abnormalities                                     |                  |         |                  |         |                  |            |                  |                  |                  |
| Grade 1                                                          |                  |         |                  |         |                  |            |                  |                  |                  |
| <b>Dorsal root ganglion, Lumbar</b>                              |                  |         |                  |         |                  |            |                  |                  |                  |
| Neuronal cell body degeneration with mononuclear cell infiltrate |                  |         |                  |         |                  |            |                  |                  |                  |
| No significant abnormalities                                     |                  |         |                  |         |                  |            |                  |                  |                  |
| Grade 1                                                          |                  |         |                  |         |                  |            |                  |                  |                  |
| Grade 2                                                          |                  |         |                  |         |                  |            |                  |                  |                  |

M=missing tissue

The findings in the DRG consisted of neuronal degeneration characterized by central chromatolysis, satellitosis, and mononuclear cell infiltrates that surrounded and invaded neuronal cell bodies (neuronophagia). DRG from the initial study, RGX151002p, were not sampled.

**Table S6.** Incidence and severity of the axonopathy finding

| Study                                  | RGX151002p       |         |                  |         |                  | RGX160822p |                  |                  |                  |
|----------------------------------------|------------------|---------|------------------|---------|------------------|------------|------------------|------------------|------------------|
|                                        | 14               |         | 90               |         | 180              | 90         |                  |                  |                  |
| Group                                  | 1A               | 2A      | 1B               | 2B      | 1C               | 1          | 2                | 3                | 4                |
| Dose (GC)                              | 10 <sup>13</sup> | Control | 10 <sup>13</sup> | Control | 10 <sup>13</sup> | Control    | 10 <sup>13</sup> | 10 <sup>12</sup> | 10 <sup>13</sup> |
| Immunosuppression                      | No               | No      | No               | No      | No               | No         | No               | No               | Yes              |
| Number of Animals                      | 3                | 1       | 3                | 2       | 3                | 1          | 3                | 3                | 3                |
| No. examined                           | 3                | 1       | 3                | 2       | 3                | 1          | 3                | 3                | 3                |
| <b>Spinal Cord, Cervical</b>           |                  |         |                  |         |                  |            |                  |                  |                  |
| Axonopathy, dorsal white matter tracts |                  |         |                  |         |                  |            |                  |                  |                  |
| No significant abnormalities           | 3                | 1       | 0                | 2       | 0                | 1          | 1                | 0                | 2                |
| Grade 1                                | -                | -       | -                | -       | 2                | -          | -                | 2                | 1                |
| Grade 2                                | -                | -       | 2                | -       | 1                | -          | 2                | 1                | -                |
| Grade 3                                | -                | -       | 1                | -       | -                | -          | -                | -                | -                |
| <b>Spinal Cord, Thoracic</b>           |                  |         |                  |         |                  |            |                  |                  |                  |
| Axonopathy, dorsal white matter tracts |                  |         |                  |         |                  |            |                  |                  |                  |
| No significant abnormalities           | 3                | 1       | 0                | 2       | 0                | 1          | 0                | 0                | 1                |
| Grade 1                                | -                | -       | 2                | -       | 2                | -          | 2                | 3                | 2                |
| Grade 2                                | -                | -       | 1                | -       | 1                | -          | 1                | -                | -                |
| <b>Spinal Cord, Lumbar</b>             |                  |         |                  |         |                  |            |                  |                  |                  |
| Axonopathy, dorsal white matter tracts |                  |         |                  |         |                  |            |                  |                  |                  |
| No significant abnormalities           | 3                | 1       | 0                | 2       | 0                | 1          | 0                | 0                | 1                |
| Grade 1                                | -                | -       | -                | -       | 1                | -          | 2                | 1                | 1                |
| Grade 2                                | -                | -       | 3                | -       | 2                | -          | 1                | 2                | 1                |

The dorsal white matter tracts of the spinal cord had an axonopathy characterized by dilated myelin sheaths with and without myelomacrophages, which was consistent with axonal degeneration.
